# Supplementary material for: Quality of Diabetes Care in Germany Improved from 2000 to 2007 to 2014, but Improvements Diminished since 2007. Evidence from the Population-Based KORA Studies
Source: PubMed Central journal article supplement (PMC5066975; doi:10.1371/journal.pone.0164704), 2016-10-17
Supplement: pone.0164704.s002.pdf [file pone.0164704.s002.pdf]

**S2 Table.** Time trends of patient self-management I.

|                                                       | S4 study  | F4 study  | FF4 study | Association |              |              |
|-------------------------------------------------------|-----------|-----------|-----------|-------------|--------------|--------------|
|                                                       | 1999-2001 | 2006-2008 | 2013/2014 | Comparison  | Odds Ratio † | [95% - CI]   |
|                                                       | %         | %         | %         |             |              |              |
| Self-monitoring of blood glucose<br>(≥1 times/week)   | No data   | 55.3      | 42.6      | F4 vs. S4   |              |              |
|                                                       |           |           |           | FF4 vs. F4  | 0.56         | [0.39, 0.81] |
|                                                       |           |           |           | FF4 vs. S4  |              |              |
| Self-monitoring of blood pressure<br>(≥1 times/week)  | 55.0      | 53.6      | 48.5      | F4 vs. S4   | 0.86         | [0.56, 1.31] |
|                                                       |           |           |           | FF4 vs. F4  | 0.82         | [0.59, 1.15] |
|                                                       |           |           |           | FF4 vs. S4  | 0.70         | [0.43, 1.15] |
| Self-monitoring of body weight<br>(≥1 times/week)     | No data   | 53.8      | 55.3      | F4 vs. S4   |              |              |
|                                                       |           |           |           | FF4 vs. F4  | 1.11         | [0.77, 1.61] |
|                                                       |           |           |           | FF4 vs. S4  |              |              |
| Checking feet<br>(≥1 times/week)                      | No data   | 56.6      | 50.2      | F4 vs. S4   |              |              |
|                                                       |           |           |           | FF4 vs. F4  | 0.80         | [0.56, 1.16] |
|                                                       |           |           |           | FF4 vs. S4  |              |              |
| Not smoking<br>(currently)                            | 86.0      | 89.2      | 91.5      | F4 vs. S4   | 1.19         | [0.75, 1.88] |
|                                                       |           |           |           | FF4 vs. F4  | 1.01         | [0.65, 1.56] |
|                                                       |           |           |           | FF4 vs. S4  | 1.20         | [0.65, 2.22] |
| Physical Activity<br>(≥2hours/week)                   | 13.3      | 12.3      | 16.5      | F4 vs. S4   | 1.01         | [0.53, 1.93] |
|                                                       |           |           |           | FF4 vs. F4  | 1.20         | [0.71, 2.03] |
|                                                       |           |           |           | FF4 vs. S4  | 1.22         | [0.62, 2.38] |
| Participation in a diabetes education class<br>(ever) | 47.3      | 54.0      | 43.1      | F4 vs. S4   | 1.62         | [1.07, 2.44] |
|                                                       |           |           |           | FF4 vs. F4  | 0.63         | [0.44, 0.90] |
|                                                       |           |           |           | FF4 vs. S4  | 1.01         | [0.62, 1.64] |
| Having a diabetes diary<br>(currently)                | 71.0      | 58.0      | 40.0      | F4 vs. S4   | 0.41         | [0.26, 0.64] |
|                                                       |           |           |           | FF4 vs. F4  | 0.60         | [0.38, 0.96] |
|                                                       |           |           |           | FF4 vs. S4  | 0.25         | [0.14, 0.42] |

† logistic regression models adjusted for sex, age, age<sup>2</sup>, education, diabetes duration, and history of CVD.
