# Supplementary material for: Quality of Diabetes Care in Germany Improved from 2000 to 2007 to 2014, but Improvements Diminished since 2007. Evidence from the Population-Based KORA Studies
Source: PubMed Central journal article supplement (PMC5066975; doi:10.1371/journal.pone.0164704), 2016-10-17
Supplement: pone.0164704.s003.pdf [file pone.0164704.s003.pdf]

**S3 Table.** Time trends of physician-delivered care I.

|                                                              | S4 study  | F4 study  | FF4 study | Association |            |               |
|--------------------------------------------------------------|-----------|-----------|-----------|-------------|------------|---------------|
|                                                              | 1999-2001 | 2006-2008 | 2013/2014 | Comparison  | Odds Ratio | [95%- CI]     |
|                                                              | %         | %         | %         |             |            |               |
| Control of HbA1c<br>(last 12 months)                         | 29.3      | 52.5      | 71.6      | F4 vs. S4   | 3.22       | [2.07, 5.02]  |
|                                                              |           |           |           | FF4 vs. F4  | 2.55       | [1.70, 3.82]  |
|                                                              |           |           |           | FF4 vs. S4  | 8.20       | [4.83, 13.94] |
| Control of blood pressure<br>(last 12 months)                | No data   | 95.5      | 96.1      | F4 vs. S4   |            |               |
|                                                              |           |           |           | FF4 vs. F4  | 1.21       | [0.50, 2.92]  |
|                                                              |           |           |           | FF4 vs. S4  |            |               |
| Control of cholesterol<br>(last 12 months)                   | No data   | 90.6      | 87.8      | F4 vs. S4   |            |               |
|                                                              |           |           |           | FF4 vs. F4  | 0.77       | [0.42, 1.42]  |
|                                                              |           |           |           | FF4 vs. S4  |            |               |
| Control of protein in urine<br>(last 12 months)              | No data   | 73.1      | 61.7      | F4 vs. S4   |            |               |
|                                                              |           |           |           | FF4 vs. F4  | 0.59       | [0.39, 0.90]  |
|                                                              |           |           |           | FF4 vs. S4  |            |               |
| Eye examination<br>(last 12 months)                          | 61.1      | 72.6      | 63.8      | F4 vs. S4   | 2.77       | [1.75, 4.37]  |
|                                                              |           |           |           | FF4 vs. F4  | 0.79       | [0.55, 1.15]  |
|                                                              |           |           |           | FF4 vs. S4  | 2.19       | [1.35, 3.57]  |
| Foot examination<br>(last 12 months)                         | 36.9      | 57.0      | 51.7      | F4 vs. S4   | 1.61       | [1.05, 2.48]  |
|                                                              |           |           |           | FF4 vs. F4  | 0.63       | [0.42, 0.94]  |
|                                                              |           |           |           | FF4 vs. S4  | 1.01       | [0.63, 1.61]  |
| Counselling on topic 'physical activity'<br>(last 12 months) | No data   | 56.0      | 48.1      | F4 vs. S4   |            |               |
|                                                              |           |           |           | FF4 vs. F4  | 0.70       | [0.47, 1.05]  |
|                                                              |           |           |           | FF4 vs. S4  |            |               |
| Counselling on topic 'diet'<br>(last 12 months)              | No data   | 58.3      | 44.4      | F4 vs. S5   |            |               |
|                                                              |           |           |           | FF4 vs. F5  | 0.59       | [0.40, 0.86]  |
|                                                              |           |           |           | FF4 vs. S5  |            |               |

I logistic regression models adjusted for sex, age, age<sup>2</sup> education, diabetes duration, and history of CVD
