# Supplementary material for: Quality of Diabetes Care in Germany Improved from 2000 to 2007 to 2014, but Improvements Diminished since 2007. Evidence from the Population-Based KORA Studies
Source: PubMed Central journal article supplement (PMC5066975; doi:10.1371/journal.pone.0164704), 2016-10-17
Supplement: pone.0164704.s004.pdf [file pone.0164704.s004.pdf]

**S4 Table.** Time trends of medication use, of reaching treatment targets and of microvascular complications †.

|                                                               | S4 study  | F4 study  | FF4 study | Association |            |               |
|---------------------------------------------------------------|-----------|-----------|-----------|-------------|------------|---------------|
|                                                               | 1999-2001 | 2006-2008 | 2013/2014 | Comparison  | Odds Ratio | [95%- CI]     |
|                                                               | %         | %         | %         |             |            |               |
| <b>Medication Use</b>                                         |           |           |           |             |            |               |
| Intake of oral glucose lowering medication (last 7 days)      | 70.7      | 71.9      | 84.4      | F4 vs. S4   | 1.07       | [0.67, 1.70]  |
|                                                               |           |           |           | FF4 vs. F4  | 2.34       | [1.48, 3.68]  |
|                                                               |           |           |           | FF4 vs. S4  | 2.50       | [1.44, 4.34]  |
| Intake of insulin (last 7 days)                               | 22.0      | 23.2      | 13.3      | F4 vs. S4   | 1.20       | [0.67, 2.14]  |
|                                                               |           |           |           | FF4 vs. F4  | 0.39       | [0.24, 0.65]  |
|                                                               |           |           |           | FF4 vs. S4  | 0.47       | [0.22, 0.98]  |
| Intake of blood pressure lowering medication (last 7 days)    | 62.0      | 76.4      | 75.4      | F4 vs. S4   | 1.77       | [1.14, 2.74]  |
|                                                               |           |           |           | FF4 vs. F4  | 0.73       | [0.49, 1.10]  |
|                                                               |           |           |           | FF4 vs. S4  | 1.30       | [0.80, 2.09]  |
| Intake of lipid lowering medication (last 7 days)             | 18.7      | 40.4      | 45.5      | F4 vs. S4   | 2.96       | [1.80, 4.86]  |
|                                                               |           |           |           | FF4 vs. F4  | 1.18       | [0.83, 1.68]  |
|                                                               |           |           |           | FF4 vs. S4  | 3.50       | [2.02, 6.06]  |
| Intake of platelet inhibiting medication (last 7 days)        | 31.3      | 34.0      | 32.7      | F4 vs. S5   | 0.89       | [0.56, 1.43]  |
|                                                               |           |           |           | FF4 vs. F5  | 0.79       | [0.52, 1.23]  |
|                                                               |           |           |           | FF4 vs. S5  | 0.71       | [0.42, 1.21]  |
| <b>Reaching treatment targets</b>                             |           |           |           |             |            |               |
| HbA1c < 7,0% †                                                | 60.5      | 66.7      | 71.3      | F4 vs. S4   | 1.20       | [0.77, 1.86]  |
|                                                               |           |           |           | FF4 vs. F4  | 1.30       | [0.85, 1.98]  |
|                                                               |           |           |           | FF4 vs. S4  | 1.56       | [0.93, 2.60]  |
| Bloodpressure < 140 mmHg (syst.) and < 80 mmHg (diast.) †     | 25.3      | 63.6      | 68.9      | F4 vs. S4   | 5.25       | [3.34, 8.25]  |
|                                                               |           |           |           | FF4 vs. F4  | 1.17       | [0.78, 1.76]  |
|                                                               |           |           |           | FF4 vs. S4  | 6.14       | [3.73, 10.09] |
| BMI < 30kg/m <sup>2</sup>                                     | 41.2      | 43.9      | 43.9      | F4 vs. S4   | 0.87       | [0.64, 1.18]  |
|                                                               |           |           |           | FF4 vs. F4  | 0.85       | [0.63, 1.14]  |
|                                                               |           |           |           | FF4 vs. S4  | 0.74       | [0.48, 1.13]  |
| LDL-cholesterol < 2.6 mmol/l †                                | 12.9      | 22.8      | 27.4      | F4 vs. S4   | 4.56       | [2.17, 9.54]  |
|                                                               |           |           |           | FF4 vs. F4  | 1.20       | [0.77, 1.87]  |
|                                                               |           |           |           | FF4 vs. S4  | 5.47       | [2.52, 11.84] |
| HDL cholesterol >1.0 mmol/l in men and >1.3 mmol/l in women † | 51.0      | 59.4      | 75.0      | F4 vs. S4   | 1.18       | [0.49, 2.82]  |
|                                                               |           |           |           | FF4 vs. F4  | 2.69       | [1.83, 3.94]  |
|                                                               |           |           |           | FF4 vs. S4  | 3.17       | [1.24, 8.13]  |
| Triglycerids <1.71 mmol/l †                                   | 23.2      | 52.5      | 60.4      | F4 vs. S4   | 1.06       | [0.48, 2.35]  |
|                                                               |           |           |           | FF4 vs. F4  | 1.23       | [0.88, 1.72]  |
|                                                               |           |           |           | FF4 vs. S4  | 1.31       | [0.57, 3.04]  |
| <b>Microvascular complications</b>                            |           |           |           |             |            |               |
| Retinopathy (ever)                                            | 12.0      | 7.4       | 9.4       | F4 vs. S4   | 0.55       | [0.27, 1.11]  |
|                                                               |           |           |           | FF4 vs. F4  | 1.21       | [0.62, 2.36]  |
|                                                               |           |           |           | FF4 vs. S4  | 0.67       | [0.31, 1.45]  |
| Proteinuria (ever)                                            | 13.3      | 7.9       | 7.1       | F4 vs. S4   | 0.73       | [0.36; 1.45]  |
|                                                               |           |           |           | FF4 vs. F4  | 0.84       | [0.44; 1.61]  |
|                                                               |           |           |           | FF4 vs. S4  | 0.61       | [0.28; 1.32]  |
| Neuropathy in legs (ever)                                     | 48.0      | 31.0      | 21.7      | F4 vs. S4   | 0.44       | [0.29; 0.67]  |
|                                                               |           |           |           | FF4 vs. F4  | 0.61       | [0.40; 0.93]  |
|                                                               |           |           |           | FF4 vs. S4  | 0.27       | [0.16; 0.44]  |

† based on guidelines of the German Diabetes Association (DDG) 2014. † based on guidelines of the American Diabetes Association (ADA) 2014. † logistic regression model adjusted for sex, age, age<sup>2</sup>, education, diabetes duration, history of CVD, (and fasting status).
